# Supplementary material for: Programmable, Multiplexed DNA Circuits Supporting Clinically Relevant, Electrochemical Antibody Detection
Source: PubMed Central journal article supplement (PMC8240086; doi:10.1021/acssensors.1c00790), 2021-06-15
Supplement: se1c00790_si_001.pdf [file se1c00790_si_001.pdf]

Supplementary Information:

## Programmable, Multiplexed DNA Circuits Supporting Clinically Relevant, Electrochemical Antibody Detection

Sara Bracaglia,<sup>1</sup> Simona Ranallo,<sup>1,2,\*</sup> Kevin W. Plaxco<sup>2</sup> and Francesco Ricci<sup>1,\*</sup>

<sup>1</sup>Department of Chemical Science and Technologies, University of Rome Tor Vergata, 00133, Italy;

<sup>2</sup>Department of Chemistry and Biochemistry, University of California Santa Barbara, CA93106, United States;

## Supplementary Methods

### DNA Sequences

HPLC purified oligonucleotides were purchased from IBA (Gottingen, Germany), Biosearch Technologies (Risskov, Denmark) and Metabion International AG (Planegg, Germany). PNA/Peptide chimera probes were purchased from Panagene (South Korea). All sequences were designed using Nupack or IDT oligoanalyzer tools.<sup>1,2</sup>

**Table S-1:** Anti-Dig responsive circuit

| Name            | Sequence (5' - 3')                                                                    |
|-----------------|---------------------------------------------------------------------------------------|
| S1              | <u>CCT CAT CAT CAT ATA CGT CAC CTA TCC CAT TCT</u>                                    |
| Capture probe   | (Thiol C6 SS) - CCT CAT CAT CAT ATA CGT CAC                                           |
| Reporter strand | GTG ACG TAT ATG ATG ATG AGG - (Methylene Blue)                                        |
| Split#1_Stem6   | <b>AGA ATG GGA TAG</b> – TT – <i>GTC TGC</i> – TTT TTT TTT TTT - (DIG)                |
| Split#2_Stem6   | (DIG) - TTT TTT TTT TTT – <i>GCA GAC</i> – TT – <u>GTG ACG TAT ATG ATG ATG AGG</u>    |
| Split#1_Stem4   | <b>AGA ATG GGA TAG</b> - TT - <i>G TCT</i> - TTT TTT TTT TTT - (DIG)                  |
| Split#1_Stem8   | <b>AGA ATG GGA TAG</b> – TT – <i>G TCT GCT G</i> – TT TTT TTT - (DIG)                 |
| Split#1_Stem10  | <b>AGA ATG GGA TAG</b> – TT – <i>G TCT GCT GTC</i> – TTT TTT TT - (DIG)               |
| Split#1_Stem12  | <b>AGA ATG GGA TAG</b> – TT – <i>C ATC GTC GTC TGC TG</i> – TT TTT TTT TTT - (DIG)    |
| Split#1_Stem14  | <b>AGA ATG GGA TAG</b> – TT – <i>CAT CGT CTG CTG TC</i> – TT TTT TTT TTT T - (DIG)    |
| Split#2_Stem0   | (DIG) - TTT TTT TTT TTT – <i>TGG GTG</i> – TT – <u>GTG ACG TAT ATG ATG ATG AGG</u>    |
| Split#2_Stem4   | (DIG) - TTT TTT TTT TTT – <i>AGA C</i> – TT – <u>GTG ACG TAT ATG ATG ATG AGG</u>      |
| Split#2_Stem8   | (DIG) - TTT TTT TTT TT – <i>C AGC AGA C</i> – TT – <u>GTG ACG TAT ATG ATG ATG AGG</u> |
| Split#2_Stem10  | (DIG) - TTT TTT TT – <i>G ACA GCA GAC</i> – TT – <u>GTG ACG TAT ATG ATG ATG AGG</u>   |

|                |                                                                                                   |
|----------------|---------------------------------------------------------------------------------------------------|
| Split#2_Stem12 | (DIG) - TTT TTT TTT TT – <i>C AGC AGA CGA TG</i> – TT – <u>G TGA CGT<br/>ATA TGA TGA TGA GG</u>   |
| Split#2_Stem14 | (DIG) - TTT TTT TTT TT – <i>G ACA GCA GAC GAT G</i> – TT - <u>GTG ACG<br/>TAT ATG ATG ATG AGG</u> |
| Split_Ctrl#1   | <b>AGA ATG GGA TAG</b> – TT – <i>GTC TGC</i> – TTT TTT TTT TTT                                    |
| Split_Ctrl#2   | TTT TTT TTT TTT – <i>GCA GAC</i> – TT – <u>GTG ACG TAT ATG ATG ATG<br/>AGG</u>                    |

In the above sequences and those reported below with other circuits the sequence denoted in **bold** indicates the toehold domain, the underlined sequence represents the invading domain, and the sequence denoted in *italics* indicates the elements of the duplex stem.

In the above antigen-conjugated DNA strands Dig was conjugated using EDC/NHS to an amine attached via a 5-carbon linker on either the 5'- or 3'-end of the DNA. The methylene blue (MB) redox reporter for this and other DNA strands was conjugated to the 3'- amino modification on the relevant DNA using succinimide ester coupling

**Table S-2:** Anti-DNP responsive circuit

| Name               | Sequence (5' - 3')                                                                      |
|--------------------|-----------------------------------------------------------------------------------------|
| S1                 | <u>CCA ATA TCA TCA AGA GCG TAC</u> – <b>GAT TCG TGA GTA</b>                             |
| Capture Probe      | (Thiol C6 SS) - CCA ATA TCA TCA AGA GCG TAC                                             |
| Reporter strand    | GTA CGC TCT TGA TGA TAT TGG - (Methylene Blue)                                          |
| Reporter strand_AQ | GTA CGC TCT TGA TGA TAT TGG - (Anthraquinone)                                           |
| Split#1            | <b>TAC TCA CGA ATC</b> - TT - <i>G TCT GC</i> - T TTT TTT TTT TT - (DNP)                |
| Split#2            | (DNP) - TTT TTT TTT TTT - <i>GCA GAC</i> - TT - <u>G TAC GCT CTT GAT<br/>GAT ATT GG</u> |
| Split_Ctrl#1       | <b>TAC TCA CGA ATC</b> - TT - <i>G TCT GC</i> - T TTT TTT TTT TT                        |
| Split_Ctrl#2       | TTT TTT TTT TTT - <i>GCA GAC</i> - TT - <u>G TAC GCT CTT GAT GAT<br/>ATT GG</u>         |

In these antigen-conjugated strands DNP was attached via a triethylene glycol (TEG) spacer arm on either the 5'- or the 3'- terminus of the DNA. The anthraquinone (AQ) redox reporter was conjugated to the 3'-end of the relevant DNA strand through a phosphoramidite chemistry.

### Modular antibody-responsive circuit:

We have also designed a version of the antibody-responsive circuit that, by employing a a frame inversion in one of the scaffold strands, does not require the synthesis of two different antigen-conjugated strands (one in each orientation). Instead, this employs a single antigen-conjugated strand that hybridizes to both scaffold strands. We employed this with the peptide antigens in our study (as their synthesis is the most expensive). For these, we also employed a PNA, rather than a DNA, antigen-conjugated strand so as to simplify the conjugation chemistry.

**Table S-3:** Clinical antibody responsive circuit

| Name                | Sequence                                                                                                    |
|---------------------|-------------------------------------------------------------------------------------------------------------|
| Split#1_Scaffold    | 5' - <b>TAC TCA CGA ATC</b> - TT - <i>G CCT GA</i> - C CCT - AGA ATA AAA CGC CAC TG - 3'                    |
| Split#2_Scaffold    | 3' - GTC ACC GCA AAA TAA GA - 5' 5'- TCC C - <i>TC AGG C</i> - TT - <u>GTA CGC TCT TGA TGA TAT TGG</u> - 3' |
| P17_PNA chimera     | N <sub>term</sub> -(ELDRWEKIRLRP) - CAG TGG CGT TTT ATT CT - C <sub>term</sub>                              |
| epitope_PNA chimera | N <sub>term</sub> - (CVFDLGTRRLRCGGG) - CAGTGGCGTTTTATTCT-C <sub>term</sub>                                 |
| HA_PNA chimera      | N <sub>term</sub> - (YPYDVPDYA) - CAG TGG CGT TTT ATT CT - C <sub>term</sub>                                |

The sequence in parentheses represent the selected epitope portions that are terminally conjugated to PNA. The sequences of the peptide epitopes are set in parentheses.

## Supplementary Figure

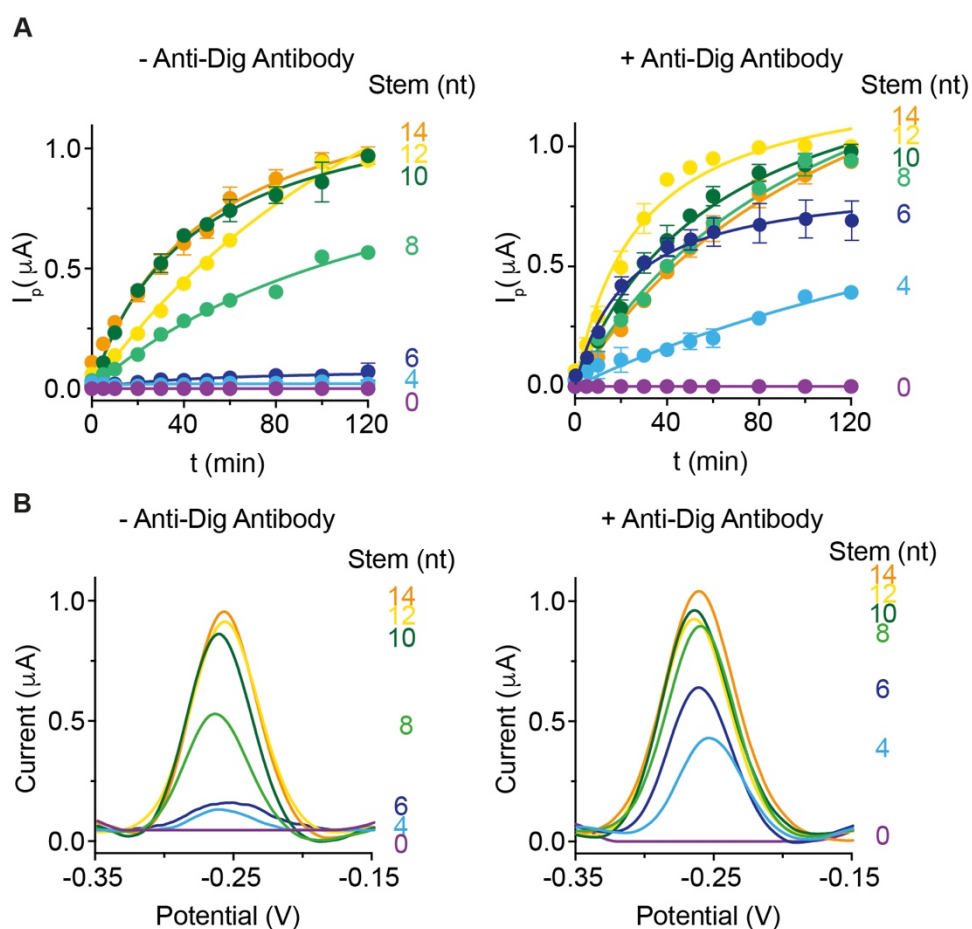

**Figure S1:** Electrochemical kinetic traces obtained by recording SWV of the anti-Dig responsive circuit for a series of Dig-conjugated DNA strands differing in the length of their complementary (from 0 to 14 bases) in the absence (A, left) and presence (A, right) of saturating anti-Dig antibody concentration. The Ab-responsive circuit was allowed to react for 30 min at RT after antibody addition and then transferred to the disposable electrode surface. (B) SWV scans were performed between -0.35 and -0.15 V at 50 Hz, after 120 min from the transfer of the solution on the electrode. The experiments were performed in a 100  $\mu\text{L}$  phosphate buffer solution (50 mM  $\text{Na}_2\text{HPO}_4$ , 150 mM NaCl, pH 7.0) containing the pre-hybridized DNA duplex (60 nM), Dig-conjugated DNA strands (100 nM each) and Anti-Dig antibodies (300 nM).

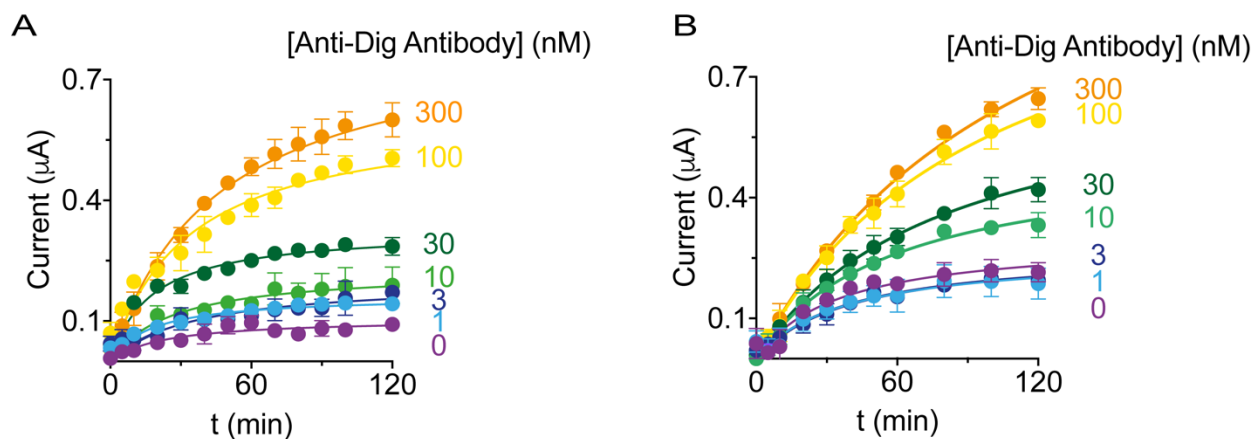

**Figure S2:** Electrochemical kinetic traces obtained by recording SWV at increasing concentration of Anti-Dig antibody preformed (A) in pure buffer (50 mM Na<sub>2</sub>HPO<sub>4</sub>, 150 mM NaCl, pH 7.0) and (B) 90% serum diluted with 10% of 10X buffer (500 mM Na<sub>2</sub>HPO<sub>4</sub>, 1.5 M NaCl, pH 7.0). The experiments were performed in a 100 μL drop solution containing the pre-hybridized DNA duplex (60 nM), Dig-conjugated DNA strands (100 nM each) and Anti-Dig antibodies (300 nM).

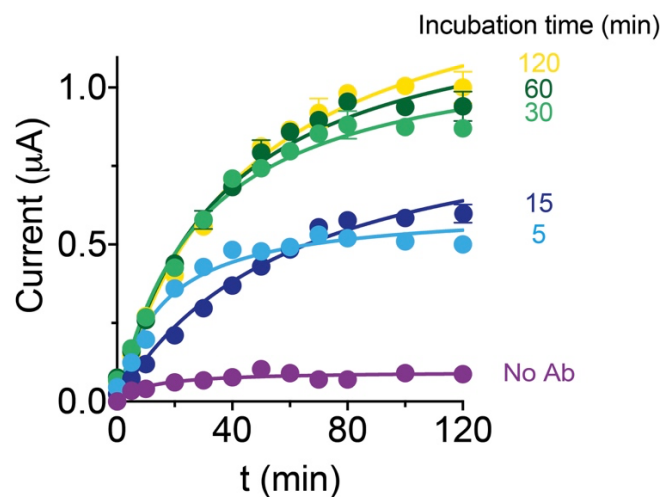

**Figure S3:** Kinetics of target hybridization at different incubating times after addition of a saturating concentration of Anti-Dig antibody. The experiment was performed in a 100  $\mu\text{L}$  phosphate buffer solution (50 mM  $\text{Na}_2\text{HPO}_4$ , 150 mM  $\text{NaCl}$ , pH 7.0) containing the pre-hybridized DNA duplex (60 nM), Dig-conjugated DNA strands (100 nM each) and Anti-Dig antibodies (300 nM).

## Supplementary References

- (1) Zadeh, J. N.; Steenberg, C. D.; Bois, J. S.; Wolfe, B. R.; Pierce, M. B.; Khan, A. R.; Dirks, R. M.; Pierce, N. A. NUPACK: Analysis and Design of Nucleic Acid Systems. *J. Comput. Chem.* **2011**, *32* (1), 170–173.
- (2) Owczarzy, R.; Tataurov, A. V.; Wu, Y.; Manthey, J. A.; McQuisten, K. A.; Almabrazi, H. G.; Pedersen, K. F.; Lin, Y.; Garretson, J.; McEntaggart, N. O.; Sailor, C. A.; Dawson, R. B.; Peek, A. S. IDT SciTools: A Suite for Analysis and Design of Nucleic Acid Oligomers. *Nucleic Acids Res* **2008**, *36* (Web Server issue), W163-169.
